# Supplementary material for: Evaluating the E3SM Land Model at a temperate forest site using flux and soil water measurements
Source: Copernicus journal article supplement (doi:10.5194/gmd-2018-34), 2018-03-05
Supplement: Supplementary file 1 [file gmd-2018-34-supplement.pdf]

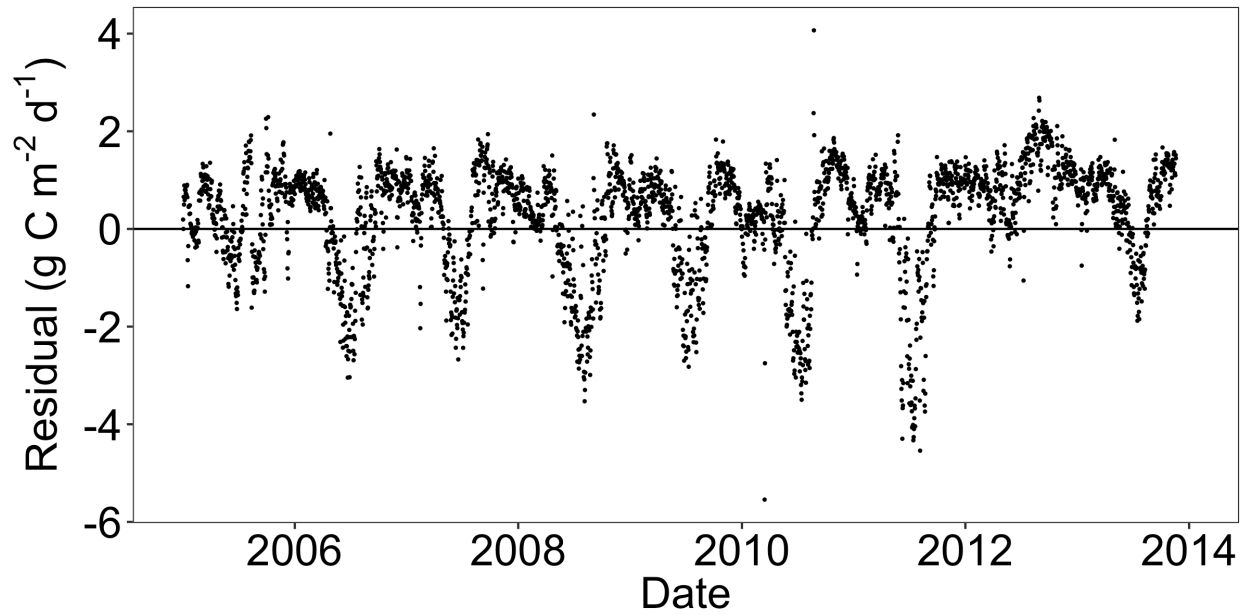

1

2 **Figure S1. Residual (modeled – observed) of soil respiration (SR) from 2005 to 2013.** The  
3 respective negative and positive residuals indicate that the E3SM underestimated SR during peak  
4 growing seasons and overestimated SR during other seasons.

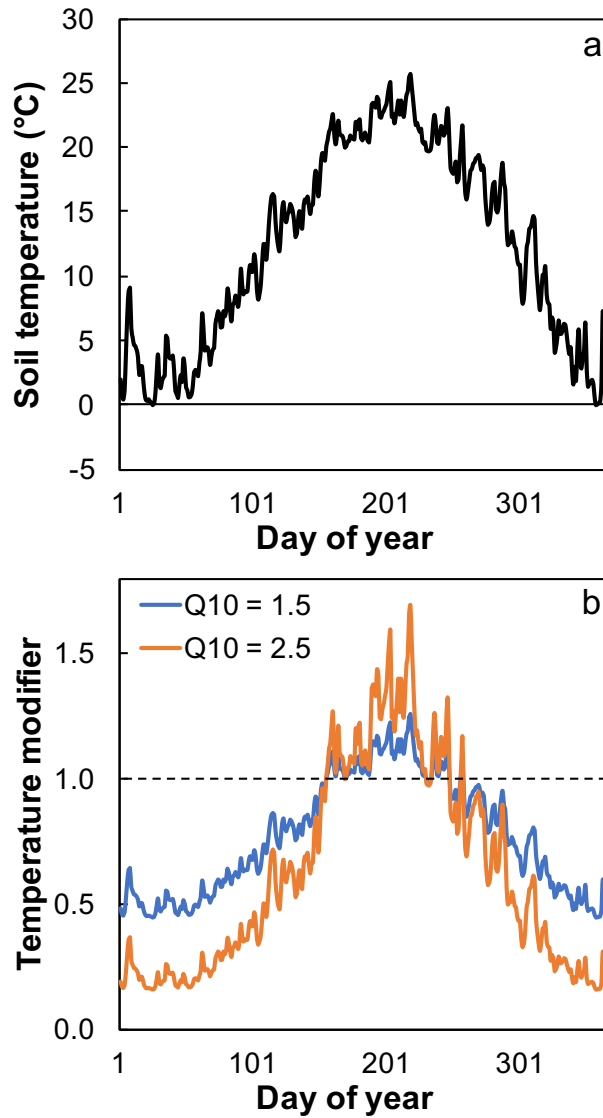

5

6 **Figure S2. An example showing the effect of  $Q_{10}$  on the seasonality of soil heterotrophic**  
 7 **respiration. a, soil temperature; b, temperature modifier on soil heterotrophic respiration with**  
 8  $Q_{10}$  of 1.5 (blue) and 2.5 (orange).

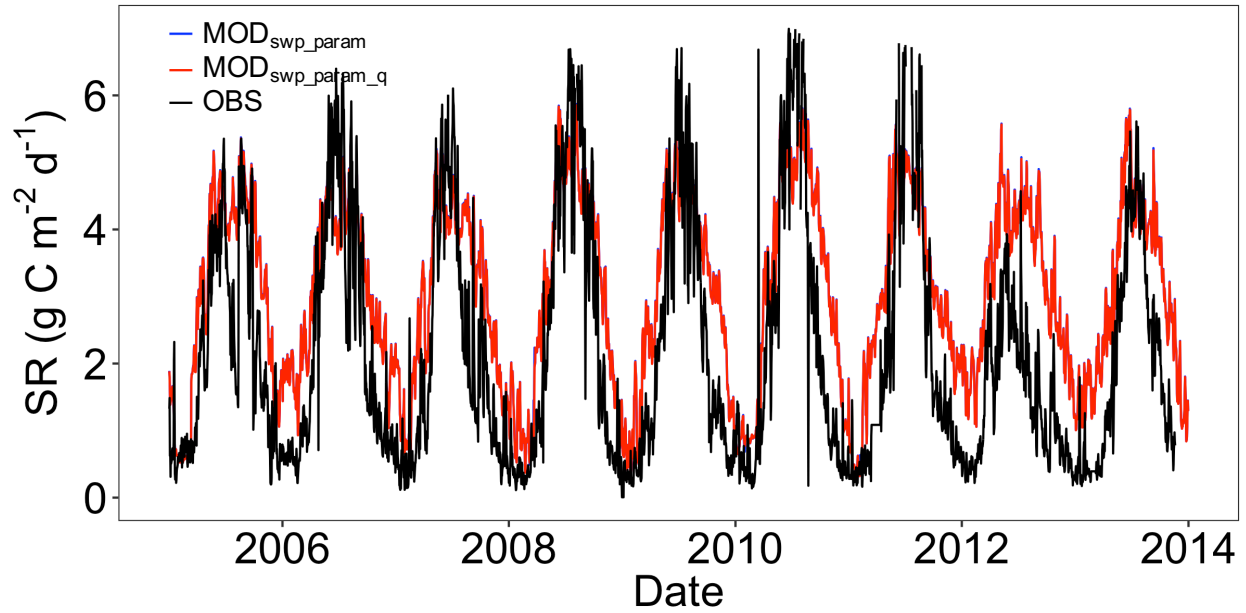

9

10 **Figure S3. Effect of  $Q_{10}$  modification on soil respiration (SR).** OBS: observation;  
 11 MOD<sub>swp\_param</sub>: model output after soil water potential improvement and parameter modification  
 12 but with the default  $Q_{10}$  value (i.e., 1.5); MOD<sub>swp\_param\_q</sub>: model output after soil water potential  
 13 improvement and parameter modification with modified  $Q_{10}$  (i.e., 2.5). The blue and red lines are  
 14 almost overlap with each other, indicating that changing  $Q_{10}$  resulted in little change in SR.

15
